# Supplementary material for: Prediction of regulatory long intergenic non-coding RNAs acting in trans through base-pairing interactions
Source: PubMed Central journal article supplement (PMC6647327; doi:10.1186/s12864-019-5946-0), 2019-07-22

Figure S2

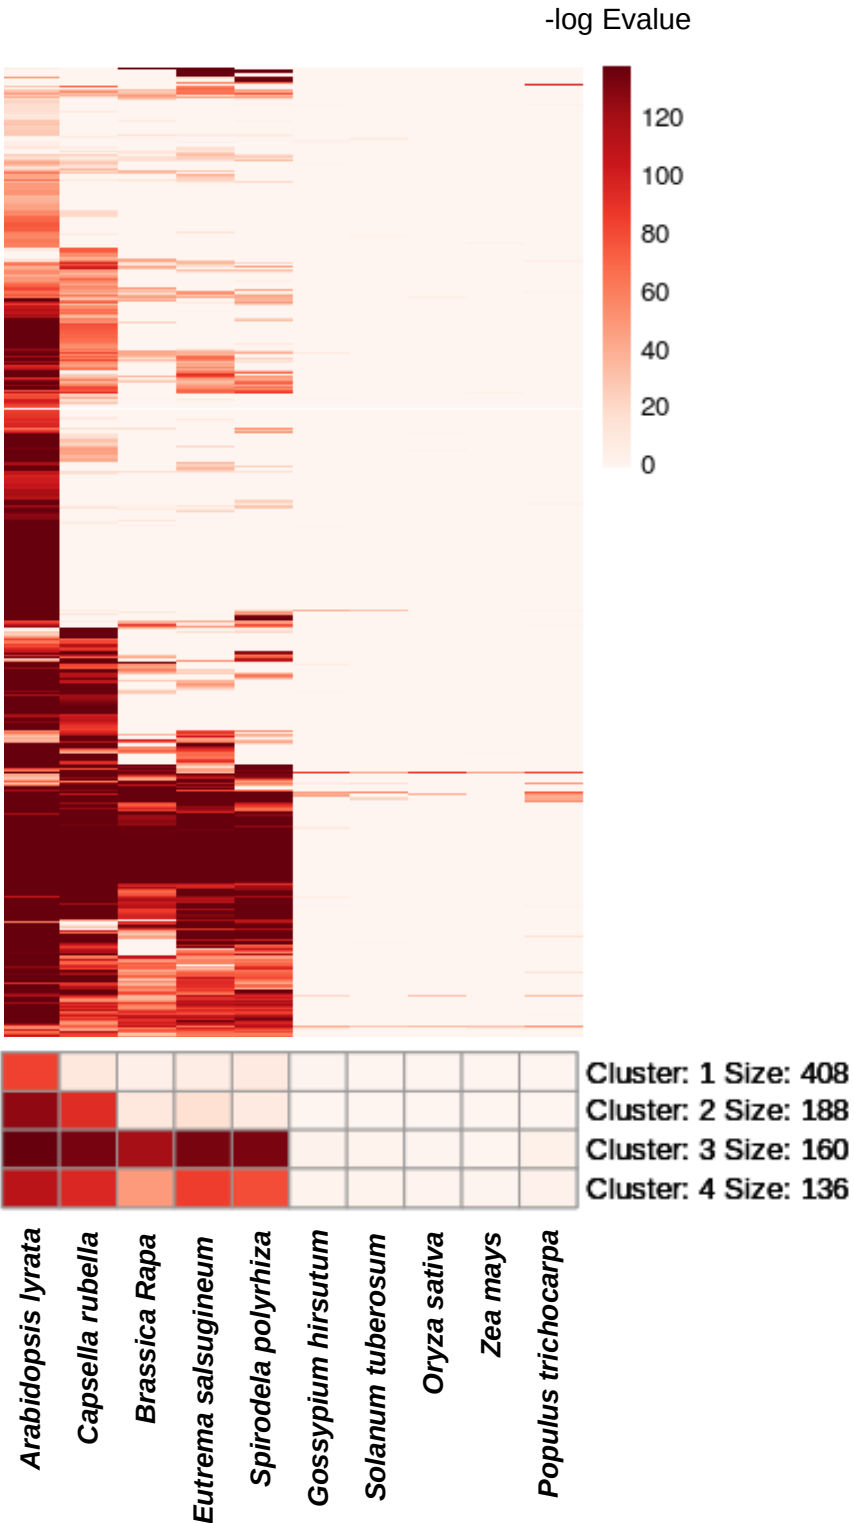

Supplement: 12864_2019_5946_MOESM2_ESM.pdf [file 12864_2019_5946_MOESM2_ESM.pdf]
